# Supplementary material
Source: ML conference proceedings conference paper supplement (https://openreview.net/forum?id=Ql7msQBqoF)
Supplement: supplementary_material [file attachment]

# MAC-CAFE: MULTI-ACTOR, CENTRALIZED CRITIC ARCHITECTURE FOR FEEDBACK-DRIVEN EDITING

**Anonymous authors**

Paper under double-blind review

## ABSTRACT

Large Language Models (LLMs) often generate incorrect or outdated information, especially in low-resource settings or when dealing with private data. To address this, Retrieval-Augmented Generation (RAG) uses external knowledge bases (KBs), but these can also suffer from inaccuracies. We introduce MAC-CAFE, a novel Multi-actor, Centralized Critic Architecture for Feedback-driven Editing approach that iteratively refines the KB based on expert feedback using a multi-actor, centralized critic reinforcement learning framework. Each document is assigned to an actor, modeled as a ReACT agent, which performs structured edits based on document-specific targeted instructions from a centralized critic. Experimental results show that MAC-CAFE significantly improves KB quality and RAG system performance, enhancing accuracy by up to 8% over baselines.

## 1 INTRODUCTION

Large Language Models (LLMs) often produce incorrect or outdated information, particularly in low-resource settings or when handling private data. Even if the information provided is accurate, LLMs can generate hallucinated or imaginary content alongside it (Maynez et al., 2020; Zhou et al., 2021). A promising solution to address these issues is the integration of retrieval components that extract relevant information from external knowledge sources, known as Retrieval-Augmented Generation (RAG) (Chen et al., 2017; Khandelwal et al., 2020; Guu et al., 2020; Izacard et al., 2022; Shi et al., 2023). For clarity, we will refer to these external knowledge sources as Knowledge Bases (KBs). However, KBs themselves can suffer from inaccuracies, incompleteness, or outdated content. To address these challenges, there is growing interest in Knowledge Editing (KE) techniques to enhance LLMs with up-to-date and accurate knowledge.

Advancements in KE have focused on updating the model’s parameters (De Cao et al., 2021a; Meng et al., 2022; 2023), adding new parameters to model (Huang et al., 2023; Yu et al., 2024), and holding additional memory (Madaan et al., 2022; Wang et al., 2024a;b). Contrary to approaches that either update model parameters or add new parameters that require white-box access to LLMs, memory-based approaches can work with black-box access to LLMs. In similar line of thought, recently, KE approaches have also focused on refining the KBs themselves (Li et al., 2024). For example, the method proposed in Li et al. (2024) continuously updates KBs with new information, such as the current identity of the British Prime Minister. This approach demonstrates that directly editing the KB is more effective than simply adding new documents, which may coexist with outdated or inaccurate ones. Removing older documents is often not feasible, as only certain sections may be incorrect, while other parts could still provide valuable information for different queries. However, in applications like chatbots or code generation using API documentation, where updated information might not be readily available in document form, expert intervention can be crucial (Ramjee et al., 2024; Afzal et al., 2024). In such cases, expert feedback can be used to directly update the KB with accurate information when the LLM produces erroneous results.

To leverage expert or oracle feedback, we propose MAC-CAFE, a **Multi-actor, Centralized Critic Architecture for Feedback-driven Editing** technique. Our contributions are as follows:

- 1. Introduction of Feedback-Driven KB Editing:** We present MAC-CAFE, a novel framework that refines the KB using structured edits based on expert feedback. This approach

allows for direct, document-level updates without requiring access to LLM parameters, making it applicable to both white-box and black-box LLMs.

2. **Multi-Actor, Centralized Critic Architecture:** We design a multi-agent reinforcement learning framework where each actor is responsible for a specific document, and a centralized critic coordinates updates based on a global reward signal. This architecture ensures that document-level edits are consistent and contribute to the overall accuracy of the RAG system.
3. **Parameterized Action Space for Document Editing:** We propose a parameterized action space for each document-specific actor, enabling fine-grained control over edits, additions, and deletions within each document. This structured action space allows the actors to perform precise modifications based on expert feedback, resulting in a refined KB that better supports the RAG system.
4. **Definition and Evaluation of KB Characteristics:** We define desirable characteristics for KB refinement, including coherence, completeness, and generalizability, and introduce corresponding metrics to quantitatively assess these properties. These metrics provide a systematic way to measure the effectiveness of KB updates.
5. **Empirical Evaluation and Performance Gains:** We demonstrate that MAC-CAFE significantly improves the accuracy and reliability of the QA system in a variety of settings. Through extensive experiments, we show that incorporating expert feedback into document-level edits leads to a substantial reduction in error rates and enhances the KB’s ability to support accurate answer generation.

This paper is organized as follows: Section 2 reviews relevant prior work, while Section 3 presents an illustrative example to introduce and explain our approach. Section 4 details the proposed methodology, and Section 5 outlines the desired characteristics for the edited KB along with metrics for evaluation. Section 6 describes the experimental setup, and finally, Section 7 reports the results.

## 2 RELATED WORK

The MAC-CAFE framework addresses a key limitation of current RAG systems: the inability to dynamically update Knowledge Bases (KBs) without retraining or altering model parameters. Our work draws from research in Retrieval-Augmented Generation (RAG), Continual Learning, Model Editing, and feedback-driven prompt optimization, incorporating insights from Multi-Agent Reinforcement Learning (MARL) to propose an effective solution for KB editing.

**Retrieval Augmented Generation (RAG):** RAG systems enhance LMs by retrieving relevant knowledge from a KB based on the input query and appending it to the context, thereby addressing the limitations of standalone LMs that lack sufficient context and produce inaccurate answers (Chen et al., 2017; Khandelwal et al., 2020; Guu et al., 2020; Izacard et al., 2022; Shi et al., 2023). These systems dynamically construct contexts from unstructured KBs without modifying the LM’s internal parameters. MAC-CAFE further enhances RAG systems by refining the KB itself based on feedback, ensuring more accurate and up-to-date information.

**Continual Learning:** Continual Learning (CL) methods address the challenge of updating LMs in non-stationary environments by ensuring that new information is learned without forgetting previously acquired knowledge (Jin et al., 2022; Xu et al., 2023; Padmanabhan et al., 2023; Akyürek et al., 2024). These methods are often computationally intensive and require large-scale retraining, making them less suitable for scenarios requiring frequent updates or minimal computational resources. MAC-CAFE, by contrast, leverages expert feedback to perform direct edits to the KB, avoiding the need for extensive retraining.

**Knowledge Editing:** Knowledge Editing approaches fall into two categories: **Model Editing**, which modifies the LM parameters directly, and **Input Editing**, which updates the knowledge supplied to the model. While Model Editing efficiently alters specific facts using specialized secondary models or altering parameters (De Cao et al., 2021b; Meng et al., 2023), it struggles to ensure consistent updates across contexts (Onoe et al., 2023; Hua et al., 2024). In contrast, Input Editing modifies the KB itself, enabling updates to be reflected in outputs without changing model parameters (Madaan et al., 2022; Wang et al., 2024a;b; Li et al., 2024). MAC-CAFE builds on input editing techniques

by leveraging expert feedback to refine the KB systematically, ensuring more accurate and consistent responses.

**Prompt Optimization:** With the advent of LMs, some recent works approximate gradients in text-based environments using LMs (Pryzant et al., 2023; Wang et al., 2023; Juneja et al., 2024; Gupta et al., 2024) for optimizing task prompts. MAC-CAFE is inspired by these approaches and generates textual reflections, similar to MetaReflection (Gupta et al., 2024) and Shinn et al. (2023), as proxies for gradients. It provides actionable guidance for document updates without the need for differentiable models. Additionally, MAC-CAFE adopts clustering strategies for feedback aggregation from works like UniPrompt (Juneja et al., 2024)- ensuring that actors receive coherent and non-redundant instructions.

**Multi-Agent Reinforcement Learning (MARL):** Multi-agent reinforcement learning (MARL) has been applied to various domains, with early research focusing on tabular methods (Busoniu et al., 2008; Canese et al., 2021; Gronauer & Diepold, 2022) and later expanding to deep learning techniques for high-dimensional inputs (Tampuu et al., 2017; Leibo et al., 2017). Studies have explored independent Q-learning (Tan, 1993), agent communication (Foerster et al., 2016; Das et al., 2017), and centralized training with decentralized execution (Gupta et al., 2017). However, most of these approaches do not address the critical challenge of multi-agent credit assignment. Actor-critic methods have been introduced to overcome this limitation by employing centralized critics with decentralized actors (Foerster et al., 2018; Iqbal & Sha, 2019; Wang et al., 2021; Chen et al., 2023). MAC-CAFE extends such actor-critic framework to operate directly on textual content, using the centralized critic to decompose feedback into actionable textual gradients for each document-specific actor.

In the next section, we provide an example to illustrate the KB editing problem, while also providing an overview of MAC-CAFE.

### 3 EXAMPLE AND OVERVIEW

Figure 1 illustrates our technique applied to the ARKS Pony domain (Su et al., 2024a), where a knowledge base (KB) for the low-resource programming language Pony supports a natural language-to-code task. Due to Pony’s rarity, language models often generate code that fails to compile. To address this, we use the Pony compiler as an expert to provide feedback in the form of compile errors.

① *Evaluating the Knowledge Base State:* We start with an initial KB, including documents like `builtin-array.md`. The system retrieves relevant documents based on the given task (e.g., counting non-inversions in an array) and generates a program, which is evaluated by the compiler, resulting in feedback (e.g., compile errors).

② *Centralized Feedback Analysis:* We analyze compile errors to generate reflections that explain why the errors occurred. For instance, if the `apply` method in the `Array` class is partial and may raise an error, the reflection suggests adding a `?` to handle potential failures. These reflections are matched to the documents they pertain to, refining the understanding of errors.

③ *Distributing Gradients:* Reflections are generalized into gradients, which summarize modifications needed for each document. For example, the theme might be the partial nature of functions like `apply` and `update`, which need better error handling in the documentation.

④ *Generating Edit Actions:* Gradients are converted into structured edit actions, such as adding or modifying content in specific sections of the documents.

⑤ *Re-evaluation and MCTS Search:* After edits are applied, the KB is re-evaluated, generating new feedback and a reward score. This score guides a Monte Carlo Tree Search (MCTS) to explore different states of the KB, iterating through steps ①-④ to progressively refine the KB and improve the system’s overall performance.

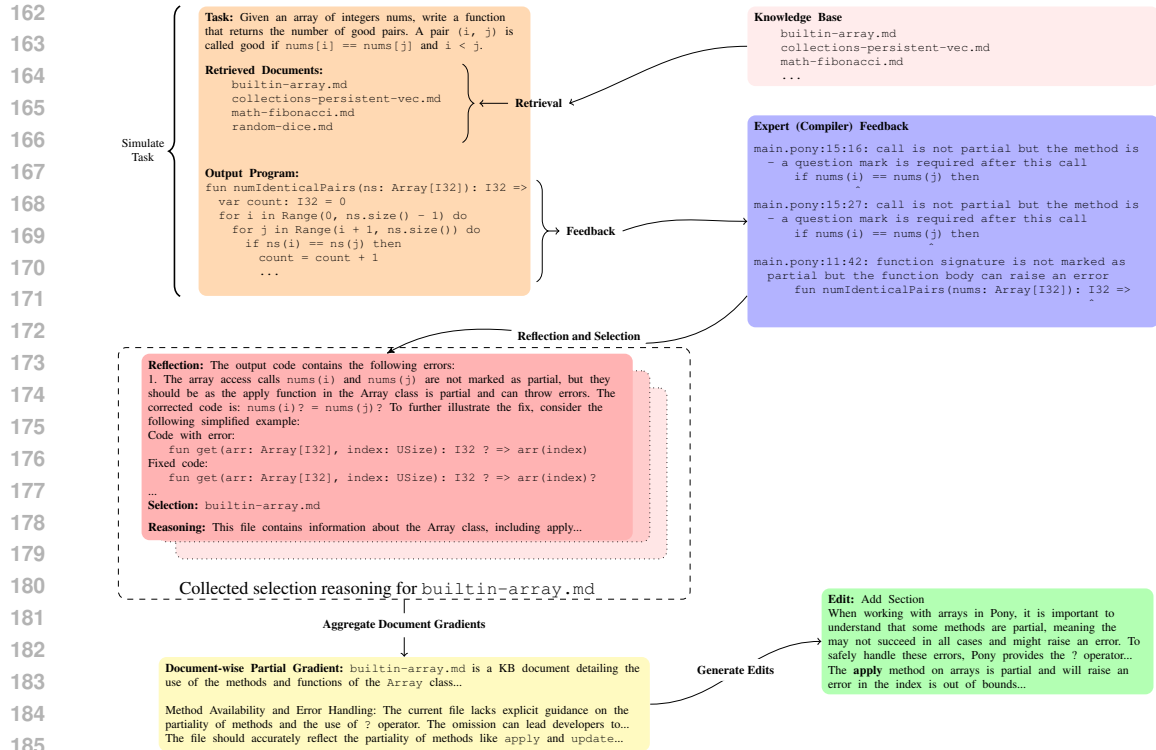

Figure 1: Example of the MAC-CAFE in the ARKS Pony scenario

## 4 METHODOLOGY

We will start by describing a typical Retrieval-Augmented Generation (RAG) system over unstructured Knowledge Bases.

Errors in such systems can arise from multiple components: 1) the LLM  $\mathcal{B}$  might fail to reason correctly over the provided information, 2) the retriever  $R$  might not select the right set of relevant documents from  $\mathcal{K}$ , or 3) the knowledge base  $\mathcal{K}$  itself might contain incorrect or incomplete information. We assume an expert is monitoring the system, identifying when answers are incorrect, determining which component is at fault, and providing feedback on why the answer is incorrect and what the correct answer must be.

This work focuses on scenarios where incorrect answers result from issues in the Knowledge Base ( $\mathcal{K}$ ). Our goal is to improve  $\mathcal{K}$  by addressing mistakes in  $\mathcal{K}$  and filling in missing information based on expert feedback, thus enhancing the RAG system’s performance on future queries.

### 4.1 PROBLEM FORMULATION

We are provided with a training set  $T = \{(q_i, o_i, c_i, f_i)\}_{i=1}^l$ , where  $q_i$  is a user query,  $o_i$  is the RAG system’s answer,  $c_i$  is the correct answer, and  $f_i$  is an optional expert feedback on incorrect answers. We also assume access to a scoring function  $g$ , which compare  $o_i$  and  $c_i$  to output a score. The objective is to optimize the knowledge base  $\mathcal{K}$  to maximize the sum of the scores for all queries in the training set:

$$\mathcal{K}^* = \arg \max_{\mathcal{K}} \frac{1}{|T|} \sum_{(q_i, a_i, c_i, f_i) \in T} g(\mathcal{B}(q_i, \Gamma(q_i, \mathcal{K})), c_i) \quad (1)$$

In the next section, we show how such an objective can be seen as a state search problem.

## 4.2 KNOWLEDGE BASE EDITING AS STATE SEARCH

In our problem setting, the Knowledge Base ( $\mathcal{K}$ ) is defined as a collection of documents  $\mathcal{K} = \{D_i\}_{i=1}^n$ . We assume each document consists of a number of chunks of text and can be represented as  $D_i = [c_{ij}]$ . The state  $s \in \mathcal{S}$  of the system is represented by the current configuration of the KB, i.e., the content of all documents in  $\mathcal{K}$ .

Given a query  $q_i$  and a set of retrieved documents  $\Gamma(q_i, \mathcal{K})$ , the LLM  $\mathcal{B}$  generates an answer  $o_i$ . When errors arise due to incomplete or incorrect information in the retrieved documents, our goal is to identify the optimal configuration of  $\mathcal{K}$  that improves the accuracy of the system’s responses. Thus, we define our state search problem as finding the best state  $s^*$  of the KB.

**State Space:** The state space  $\mathcal{S}$  encompasses all possible configurations of the KB. Each state  $s$  corresponds to a particular set of document contents, represented as:  $s = \{D_i\}_{i=1}^n$ , where  $D_i$  denotes the content of document  $i$  and  $n$  is the number of documents in  $\mathcal{K}$ . The state  $s$  captures the overall structure and content of the KB at any given point. We set  $s_0 = \mathcal{K}$ .

**State Transition Function:** The state transition function  $\mathcal{T}(s, u)$  defines how the KB changes in response to the action  $u$  taken by the agent. Each action contains modifications to one or more documents within the KB, resulting in a new KB configuration. The state transition is formalized as:  $s' = \mathcal{T}(s, u)$ , where  $s'$  is the new state of the KB after applying  $u$ .

**Action Space:** The action space  $\mathcal{A}$  consists of list of diffs  $d_i$  corresponding to each document  $D_i$ . Essentially,  $u = [d_i]_{i=1}^{|\mathcal{K}|}$ .

**Environment:** We model the environment simply as a “patch” function, that takes the diff generated by the agent and patches the KB to produce the new state.

**Optimization Objective:** Following Equation 1, our objective then is to find the optimal state  $s^*$  of the KB that maximizes the overall performance of the RAG system, as measured by a global reward function  $R$ . The optimization problem is formulated as:

$$s^* = \arg \max_{s \in \mathcal{S}} R(s) = \arg \max_{s \in \mathcal{S}} \frac{1}{|T|} \sum_{(q_i, a_i, c_i, f_i) \in T} g(\mathcal{B}(q_i, \Gamma(q_i, s)), c_i) = a \quad (2)$$

where  $R(s)$  represents the cumulative reward of the KB state  $s$ , reflecting its ability to support accurate and complete responses for a set of queries.

The reward function  $R(s)$  is derived from the expert feedback on the system’s generated answers and captures improvements in terms of correctness, coherence, and completeness of the information in the KB. By optimizing for  $s^*$ , we ensure that the final state of the KB maximizes the overall accuracy and effectiveness of the RAG system, rather than focusing on an intermediate sequence of state transitions.

In summary, the state search formulation defines the problem of finding the optimal state  $s^*$  of the KB that maximizes the system’s performance. This approach enables us to make targeted, feedback-driven edits to the KB and achieve a refined, high-quality knowledge base that better supports accurate answer generation.

**Monte Carlo Tree Search:** We employ Monte Carlo Tree Search (MCTS) similar to PROMPTAGENT (Wang et al., 2023) to search for the optimal state  $s^*$ . However, this introduces several challenges: (1) The search space for all possible KB edits is vastly larger than that of standard prompt edits typically explored in the literature (Pryzant et al., 2023; Wang et al., 2023; Juneja et al., 2024; Gupta et al., 2024), making exhaustive search infeasible. (2) Generating actions and subsequent states, as done in methods like PROMPTAGENT, is difficult in the KB editing context since fitting the entire KB into the prompt of a language model is impractical. Despite advancements in handling long contexts (Wang et al., 2020; Kitaev et al., 2020; Press et al., 2022; Su et al., 2024b), these models often struggle to leverage extensive contexts effectively Liu et al. (2024). (3) Finally, the LM would need to output the entire edited KB, which is challenging due to the inherent difficulty LMs face in generating long, coherent outputs (Bai et al., 2024).

To address these challenges, we decouple the KB edits by isolating document-level modifications based on the required updates. Since individual documents can be large, we further break down the edits into manageable sections, enabling a structured editing mechanism that focuses on specific portions of a document at a time. In the next section, we introduce MAC-CAFE, an agent designed to efficiently perform these structured edits based on feedback.

### 4.3 MAC-CAFE

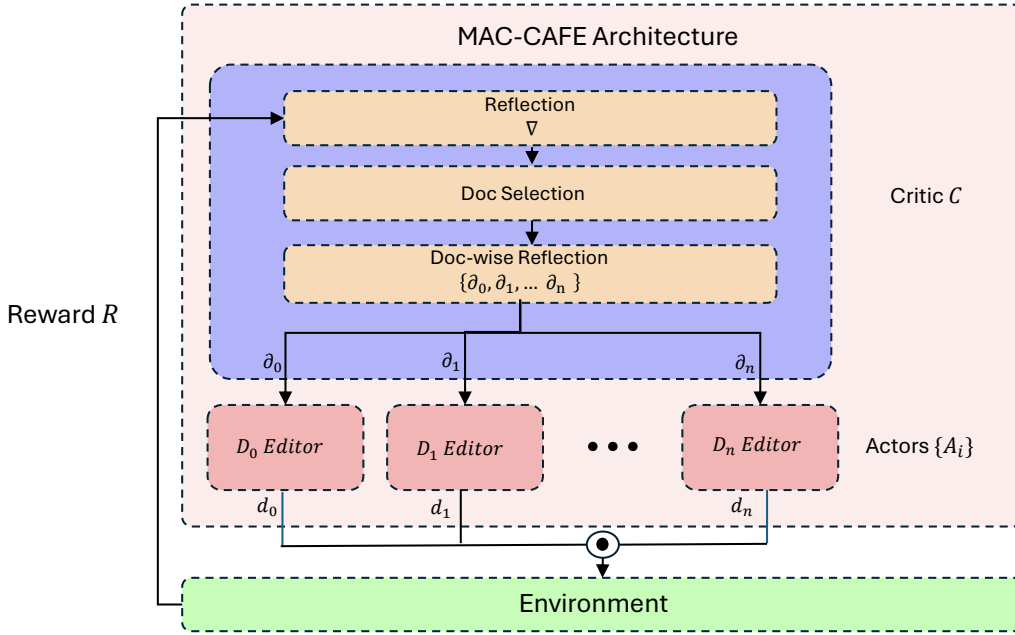

Figure 2: MAC-CAFE Multi-actor, centralized critic architecture: On receiving a reward from the environment, the critic generates a reflection over the failures to calculate the *textual gradient*  $\nabla$ . The *critic* uses this reflection to select the documents responsible for the error and proceeds to assigns credit to the actors in the form of document-wise reflections. The *actors* then proceed to iteratively edit the documents. All the document-wise edits are then pooled to define the KB edit.

The proposed approach MAC-CAFE is designed to enhance a RAG system by refining the underlying Knowledge Base ( $\mathcal{K}$ ) using expert feedback. Our approach employs a multi-actor, centralized critic architecture, where each actor is responsible for making updates to a specific document within  $\mathcal{K}$ , and a centralized critic uses global feedback to coordinate these updates. The objective is to iteratively improve  $\mathcal{K}$  such that the overall accuracy of the RAG system is maximized.

#### 4.3.1 REWARD SIGNAL

For a given query  $q_i$  and the generated answer  $o_i$ , the expert provides feedback  $(c_i, f_i)$  that includes a ground truth answer  $c_i$  and qualitative expert feedback  $f_i$  on any errors. The global reward signal is derived from  $c_i$  as per the scoring function  $s$  (Refer Equation 2).

#### 4.3.2 KB EDITING AGENT

To effectively incorporate expert feedback, we employ a multi-actor, centralized critic architecture.

**Centralized Critic:** The centralized critic, denoted as  $C$ , is responsible for evaluating the overall performance of the RAG system based on the global reward signal  $r$  derived from expert feedback. The critic analyzes the feedback received given the current state  $s$  of  $\mathcal{K}$ . The critic’s analysis is then used to provide tailored reflections to each actor, guiding document updates.

The centralized critic aggregates the reward signal across multiple queries to generate a holistic evaluation of  $\mathcal{K}$ .

$$R(s) = \frac{1}{|T|} \sum_{(q_i, a_i, c_i, f_i) \in T} g(\mathcal{B}(q_i, \Gamma(q_i, s)), c_i) \quad (3)$$

To generate feedback for the documents, the critic needs to take gradient of this reward *with respect to* the documents. This would give us,

$$\partial_j = \frac{\partial R(s)}{\partial D_j} = \frac{1}{|T|} \sum_{(q_i, a_i, c_i, f_i) \in T} \frac{\partial}{\partial D_j} g(\mathcal{B}(q_i, \Gamma(q_i, s)), c_i) \quad (4)$$

Figure 2 illustrates the environmental interaction of the actor-critic model. Following methodologies in prior works (Pryzant et al., 2023; Juneja et al., 2024; Gupta et al., 2024), we use LLMs to generate an overall text gradient  $\nabla$  over each failing example. The critic first identifies and select which documents in  $\Gamma(q_i, s)$  are responsible for any inaccuracies in  $o_i$ . Reflections are then generated for these documents based on the correct answer, expert feedback and the text gradient. However, as shown in Equation 4, we need to aggregate these reflections across all queries. Instead of a simple concatenation, we adopt the clustering approach similar to Juneja et al. (2024), producing generalized reflections that effectively capture the core insights from multiple queries. These aggregated reflections can be effectively considered as the partial textual gradient  $\partial$  with respect to the document. These partial gradients are provided as feedback to the document-specific actor  $A_j$ , which then perform the actions to edit the specific documents.

**Actors:** Each document  $D_i \in \mathcal{K}$  is managed by a distinct actor,  $A_i$ , which is modeled as a ReACT agent Yao et al. (2023) responsible for making structured edits to its document. Each actor operates independently, receiving reflections from the centralized critic on how to modify the content of  $D_i = [c_{ij}]$ . The actors need to only update these chunks as needed. The set of possible actions includes:

- EditChunk: The action is defined as  $\text{EditChunk}(j, t_j)$ , where  $j$  indicates which chunk  $c_{ij}$  of  $D_i$  to modify, and  $t_j$  is the updated content for the chunk.
- AddChunk: The action is defined as  $\text{AddChunk}(n_j, t_j)$ , where  $n_j$  indicates the name of the new chunk, and  $t_j$  is the content for the chunk.
- DeleteChunk: The action is defined as  $\text{DeleteChunk}(j)$ , where  $j$  specifies which chunk  $c_{ij}$  of  $D_i$  to remove.

This parameterized action space allows the actors to perform precise edits within the document, ensuring that the refinement process is both flexible and context-specific. Each actor leverages its local state  $s_i$  and the document-specific feedback from the critic to produce a sequence of structured edits, ensuring that modifications are consistent and contribute towards enhancing the document’s relevance and completeness.

The ReACT agent utilizes these reflections and iteratively generates a trajectory  $t_0 = a_0, a_1, a_2 \cdot a_n$  of edit actions to the document until the errors are resolved or the knowledge gaps are filled. This controlled editing process improves the accuracy of the RAG system by ensuring that the KB contains up-to-date and relevant information. After the completion of the actor runs, we generate the edit diffs for each document  $d_i$  and pool them to generate the KB edit action  $u = [d_i]_{i=1}^{|\mathcal{K}|}$

However, there might be many ways to edit a KB and we may need to have some desirable characteristics for the edited KB. In the next section, we discuss what those desirable characteristics could be and how we might measure them.

## 5 EVALUATING KNOWLEDGE BASE EDITING QUALITY

A Knowledge Base should be *complete* with respect to a task - it should contain all the information necessary to *assist* the RAG system to solve the task at hand. Given the open-ended nature of tasks

that typical RAG agents are designed for, it is hard to quantify a closed-form metric of *completeness*. That said, an ideal Knowledge Base editing system should at least be able to incorporate as much external feedback as possible.

Further, It will be extremely undesirable for any Knowledge Base to only help the RAG system for a small subset of tasks. Given the tendencies for data-driven techniques to *over-fit* on the train-set distribution, it is important that knowledge base edits are generalizable to unseen examples.

Lastly, given the semantic and textual nature of the Knowledge Base, it is important that the documents in the Knowledge base are coherent and consistent throughout. This not only makes the document interpretable for human consumption, it also help reduce in-context noise during LLM inference, which has been shown to affect LLM performance (Liu et al., 2024).

## 6 EXPERIMENTAL SETUP

### 6.1 BASELINE

While there has been a rich body of works in the area of knowledge editing and prompt optimization, to the best of our knowledge, MAC-CAFE is the first work targeting the feedback-driven textual Knowledge Base Editing problem. Therefore, to perform a holistic evaluation of MAC-CAFE we implement - PROMPTAGENT-E, an extension of PROMPTAGENT Wang et al. (2023) for the KB editing task. PROMPTAGENT formulates prompt optimization as a strategic planning problem using Monte Carlo Tree Search (MCTS). At a high-level our baseline approach, PROMPTAGENT -E creates separate PROMPTAGENT -style agents to optimize specific document in the KB. To minimize spurious edits in the Knowledge Base, we restrict PROMPTAGENT -E to only optimize documents that were part of the retrievals for more than 2 training sample. After identifying the best nodes for each of the document-wise runs, we put them back in the knowledge base to generate the new version of the KB. In contrast to MAC-CAFE, PROMPTAGENT -E can be seen as a collection of document-wise Independent Actor-Critic models (Foerster et al., 2017). We present in-depth comparisons between PROMPTAGENT -E and MAC-CAFE in Section 7

### 6.2 DATASETS

Knowledge Base Editing can be useful for scenarios where the KB is 1. Incomplete, or 2. Incorrect. We evaluate MAC-CAFE on 5 datasets spanning these different settings.

#### 6.2.1 INCOMPLETE KNOWLEDGE BASE

We adapt *two* code generation datasets from ARKS (Su et al., 2024a), namely **ARKS-Pony** and **ARKS-Ring**. The dataset consists of LeetCode problems and their solutions in low-resource languages Pony and Ring respectively. Each datapoint is supplemented with a corresponding language documentation, with execution accuracy as the success metric and execution failures as feedback to the system. Given that these language don't appear prominently in LLM pre-training data, the performance of code generation RAG agents on these datasets depends significantly on the quality of the Knowledge Base. However, given that these languages have smaller communities, their documentation isn't as well maintained and often lack critical information. For the purpose of evaluation on these datasets, we split them into train, eval, test splits as specified in Table 3. To ensure that we have a good representation of failure cases during training, we first execute the RAG pipeline on the entire dataset and divide the failures at random in a 1:1:2 ratio for train, eval and test respectively. All the datapoints with successful execution match are put in the test split. We use the compiler feedback from the executions as the expert feedback to the MAC-CAFE system.

| Dataset     | Train | Eval | Test | Documents |
|-------------|-------|------|------|-----------|
| Pony        | 31    | 32   | 45   | 601       |
| Ring        | 26    | 27   | 39   | 577       |
| ScipyM      | 22    | 22   | 98   | 3921      |
| TensorflowM | 9     | 9    | 26   | 5859      |
| CLARKS News | 30    | 30   | 60   | 138       |

Figure 3: Data splits



### 6.2.2 INCORRECT KNOWLEDGE BASE

For evaluating under this setting, we leverage the **ARKS-ScipyM** and **ARKS-TensorflowM** datasets from ARKS and the CLARK-news dataset from Erase (Li et al., 2024). The ARKS datasets consist of data science problems sourced from the DS-1000 dataset (Lai et al., 2022), which are to be solved by artificially perturbed versions of scipy and tensorflow libraries respectively, while referring to the original unperturbed documentation. Similar to Pony and Ring, we use the execution accuracy on a test bench as a success metric and use compiler outcome as expert feedback. We also follow a similar approach for data splitting.

While fact retrieval is one of the most popular use cases of RAG systems, evolving nature of information requires us to keep the knowledge bases up to date. To simulate these dynamic factual knowledge updates we use the CLARKS-news dataset from Erase (Li et al., 2024) which contains questions and their respective answers extracted from Wikidata at different timestamps. Each timestamp is characterized by a set of articles that were added in the data at that time. For our evaluation, we pool all the questions whose answers changed for the *first* time at a given timestamp and split them across train, eval and test splits in a 1:1:2 ratio (Table 3).

## 6.3 EVALUATION METRICS

In section 5 we discussed the desirable properties of a Knowledge Base edit. We leverage these properties to design 3 metrics for the KB Editing problem as follows:

**Completeness:** We use the *train set* accuracy to estimate the degree of expert feedback incorporated in the learnt Knowledge Base.

**Generalization:** To estimate the degree of generalization of our Knowledge Base edits, we use the held out *test set* accuracy.

**Coherence:** To quantify the degree of coherence of the KB, we first calculate a document-wise coherence score using G-Eval (Liu et al., 2023) with GPT4-1106-PREVIEW as the judge model. The G-eval prompt assigns a 1-5 score to the *diff* of changes with respect to the original document, checking for thematic similarity of the diff. We pool all the edited documents for a KB edit and average there respective coherence score to define the KB coherence metric.

## 6.4 SYSTEM CONFIGURATIONS

**MCTS parameters:** We use the Upper Confidence bounds applied to Trees (UCT) algorithm for selecting expansion nodes, enabling effective exploration and exploitation of the KB state space. For our experiments, we set a maximum search depth of 3, an expansion width of 3, and a maximum of 5 iterations. The UCT exploration constant is set to 2.5. These parameters were chosen to balance the computational cost and the need for adequate exploration. A depth of 3 ensures that the search can explore sufficient variations in the KB states without unnecessary expansion, while an expansion width of 3 allows a moderate number of candidate states to be evaluated at each step. Similarly, 5 iterations provide enough opportunity to refine the state search, and the UCT constant of 2.5 encourages sufficient exploration in early stages while converging towards high-reward states in later stages. For unstructured data, the documents are chunked after every 50 lines and then edit the chunks.

**RAG System:** For the purpose of our evaluations, we setup a generic RAG system which uses an embedding similarity for semantic retrieval. Additionally, in lines with prior works like (Zhang et al., 2023) for coding related tasks, we use an iterative retrieval setup wherein we first generate a code using naive retrieval and then query the database again with both the question and generated code to improve the quality of retrieval before generating the final result.

**LLM configs:** We use OPENAI-TEXT-EMBEDDING-3-LARGE as the embedding model with dimensions size of 3072 and use cosine similarity as a metric of embedding match for ranking. To account for the 8191 max input limit, we create document chunks of at most 7500 tokens. For the reasoning model, we use GPT4-1106-PREVIEW, with a temperature of 0. Since LLMs are known to perform poorly with longer context input (Liu et al., 2024), we restrict the max token budget for retrievals at 18000 tokens and remove any lower ranked retrieval to fit this token budget.

## 7 RESULTS

| Dataset       | Ring         |          | Pony         |          | SciPy        |          | Tensorflow   |          | CLARK-news   |          |
|---------------|--------------|----------|--------------|----------|--------------|----------|--------------|----------|--------------|----------|
|               | Acc          | $\sigma$ | Acc          | $\sigma$ | Acc          | $\sigma$ | Acc          | $\sigma$ | Acc          | $\sigma$ |
| Base KB       | 30.77        | 2.09     | 29.99        | 1.57     | 52.04        | 0.00     | 28.88        | 2.18     | 26.27        | 1.20     |
| PROMPTAGENT-E | 33.33        | 2.81     | 32.22        | 1.57     | 53.40        | 3.12     | 47.77        | 3.57     | 28.80        | 2.39     |
| MAC-CAFE      | <b>36.75</b> | 1.21     | <b>37.04</b> | 1.28     | <b>59.38</b> | 1.22     | <b>53.84</b> | 3.11     | <b>37.28</b> | 1.69     |

Table 1: Comparison of Generalization performance of MAC-CAFE and baselines on various datasets

| Dataset        | Ring        | Pony        | SciPy        | Tensorflow   | CLARK-news   |
|----------------|-------------|-------------|--------------|--------------|--------------|
| Base KB        | 1.28        | 0.00        | 00.00        | 00.00        | 10.34        |
| PROMPTAGENT -E | 4.27        | 3.22        | <b>33.33</b> | 33.33        | 11.86        |
| MAC-CAFE       | <b>8.98</b> | <b>9.68</b> | 31.38        | <b>44.44</b> | <b>13.79</b> |

Table 2: Comparison of Completeness metric for MAC-CAFE and baselines on various datasets

### 7.1 COMPLETENESS AND GENERALIZATION

We observe consistent improvements over the PROMPTAGENT-E baseline in completeness and generalizability scores, with MAC-CAFE achieving approximately 2x performance gains on Ring and Pony datasets. However, feedback incorporation remains limited, likely due to suboptimal retrieval or limited document-query associations hindering generalization. MAC-CAFE also demonstrates higher generalizability and lower variance, attributed to its structured and focused document edits that enhance coherence.

| Dataset       | Ring        | Pony       | SciPy       | Tensorflow | CLARK-news |
|---------------|-------------|------------|-------------|------------|------------|
| PROMPTAGENT-E | 4.33        | 1.86       | 2.0         | 4.0        | 1          |
| MAC-CAFE      | <b>4.67</b> | <b>4.6</b> | <b>4.30</b> | 4.0        | 1          |

Table 3: Comparison of Coherence metric for MAC-CAFE and baselines on various datasets. Score ranged from 1-5. Higher scores are better

### 7.2 MAC-CAFE MAKES HIGH QUALITY COHERENT EDITS

As seen in Table 3, MAC-CAFE produces edits with a coherence score of 4 or higher for most datasets. For KBs which need long term maintenance (like language and code documentation as seen in the ARKS datasets), MAC-CAFE makes more coherent edits compared to the baseline. This is especially true for long documents as seen in the ARKS Pony dataset. For news-article like dataset like CLARK-news with factual edits. Incoherency is naturally induced when the facts of the article are changed. For instance, an article on the coronation of a king will lose coherency when the article is updated to add information about the coronation of a new king.

## 8 CONCLUSION

We introduced MAC-CAFE, a novel framework for refining Knowledge Bases (KBs) in Retrieval-Augmented Generation (RAG) systems using a multi-actor, centralized critic architecture. MAC-CAFE enables efficient KB updates without retraining or altering model parameters by leveraging feedback-driven structured edits and textual gradients.

Our approach achieved superior performance in preserving knowledge base (KB) coherence, consistency, and completeness, resulting in enhanced RAG system responses. Nonetheless, there remains considerable potential for further advancements. Future work will focus on refining these three metrics to elevate system performance even further.

## REFERENCES

- 540  
541  
542 Anum Afzal, Alexander Kowsik, Rajna Fani, and Florian Matthes. Towards optimizing and  
543 evaluating a retrieval augmented qa chatbot using llms with human in the loop, 2024. URL  
544 <https://arxiv.org/abs/2407.05925>.
- 545 Afra Feyza Akyürek, Ekin Akyürek, Leshem Choshen, Derry Wijaya, and Jacob Andreas. De-  
546 ductive closure training of language models for coherence, accuracy, and updatability. In Lun-  
547 Wei Ku, Andre Martins, and Vivek Srikumar (eds.), *Findings of the Association for Computa-*  
548 *tional Linguistics ACL 2024*, pp. 9802–9818, Bangkok, Thailand and virtual meeting, August  
549 2024. Association for Computational Linguistics. doi: 10.18653/v1/2024.findings-acl.584. URL  
550 <https://aclanthology.org/2024.findings-acl.584>.
- 551 Yushi Bai, Jiajie Zhang, Xin Lv, Linzhi Zheng, Siqi Zhu, Lei Hou, Yuxiao Dong, Jie Tang, and  
552 Juanzi Li. Longwriter: Unleashing 10,000+ word generation from long context llms, 2024. URL  
553 <https://arxiv.org/abs/2408.07055>.
- 554 Lucian Busoni, Robert Babuska, and Bart De Schutter. A comprehensive survey of multiagent rein-  
555 forcement learning. *IEEE Transactions on Systems, Man, and Cybernetics, Part C (Applications*  
556 *and Reviews)*, 38(2):156–172, 2008. doi: 10.1109/TSMCC.2007.913919.
- 557 Lorenzo Canese, Gian Carlo Cardarilli, Luca Di Nunzio, Rocco Fazzolari, Daniele Giardino, Marco  
558 Re, and Sergio Spanò. Multi-agent reinforcement learning: A review of challenges and appli-  
559 cations. *Applied Sciences*, 11(11), 2021. ISSN 2076-3417. doi: 10.3390/app11114948. URL  
560 <https://www.mdpi.com/2076-3417/11/11/4948>.
- 561 Danqi Chen, Adam Fisch, Jason Weston, and Antoine Bordes. Reading Wikipedia to answer open-  
562 domain questions. In Regina Barzilay and Min-Yen Kan (eds.), *Proceedings of the 55th Annual*  
563 *Meeting of the Association for Computational Linguistics (Volume 1: Long Papers)*, pp. 1870–  
564 1879, Vancouver, Canada, July 2017. Association for Computational Linguistics. doi: 10.18653/  
565 v1/P17-1171. URL <https://aclanthology.org/P17-1171>.
- 566 Wubing Chen, Wenbin Li, Xiao Liu, Shangdong Yang, and Yang Gao. Learning explicit credit  
567 assignment for cooperative multi-agent reinforcement learning via polarization policy gradient.  
568 *Proceedings of the AAAI Conference on Artificial Intelligence*, 37(10):11542–11550, Jun 2023.  
569 doi: 10.1609/aaai.v37i10.26364. URL <https://ojs.aaai.org/index.php/AAAI/article/view/26364>.
- 570 Abhishek Das, Satwik Kottur, José M. F. Moura, Stefan Lee, and Dhruv Batra. Learning cooperative  
571 visual dialog agents with deep reinforcement learning. In *2017 IEEE International Conference*  
572 *on Computer Vision (ICCV)*, pp. 2970–2979, 2017. doi: 10.1109/ICCV.2017.321.
- 573 Nicola De Cao, Wilker Aziz, and Ivan Titov. Editing factual knowledge in language models. In  
574 Marie-Francine Moens, Xuanjing Huang, Lucia Specia, and Scott Wen-tau Yih (eds.), *Proceed-*  
575 *ings of the 2021 Conference on Empirical Methods in Natural Language Processing*, pp. 6491–  
576 6506, Online and Punta Cana, Dominican Republic, November 2021a. Association for Computa-  
577 tional Linguistics. doi: 10.18653/v1/2021.emnlp-main.522. URL <https://aclanthology.org/2021>.  
578 emnlp-main.522.
- 579 Nicola De Cao, Wilker Aziz, and Ivan Titov. Editing factual knowledge in language models. In  
580 Marie-Francine Moens, Xuanjing Huang, Lucia Specia, and Scott Wen-tau Yih (eds.), *Proceed-*  
581 *ings of the 2021 Conference on Empirical Methods in Natural Language Processing*, pp. 6491–  
582 6506, Online and Punta Cana, Dominican Republic, November 2021b. Association for Computa-  
583 tional Linguistics. doi: 10.18653/v1/2021.emnlp-main.522. URL <https://aclanthology.org/2021>.  
584 emnlp-main.522.
- 585 Jakob N. Foerster, Yannis M. Assael, Nando de Freitas, and Shimon Whiteson. Learning to com-  
586 municate with deep multi-agent reinforcement learning. In *Proceedings of the 30th International*  
587 *Conference on Neural Information Processing Systems, NIPS’ 16*, pp. 2145–2153, Red Hook, NY,  
588 USA, 2016. Curran Associates Inc. ISBN 9781510838819.
- 589 Jakob N. Foerster, Gregory Farquhar, Triantafyllos Afouras, Nantas Nardelli, and Shimon Whiteson.  
590 Counterfactual multi-agent policy gradients. In *AAAI Conference on Artificial Intelligence*, 2017.  
591 URL <https://api.semanticscholar.org/CorpusID:19141434>.

- 594 Jakob N. Foerster, Gregory Farquhar, Triantafyllos Afouras, Nantas Nardelli, and Shimon White-  
595 son. Counterfactual multi-agent policy gradients. In *Proceedings of the Thirty-Second AAAI*  
596 *Conference on Artificial Intelligence and Thirtieth Innovative Applications of Artificial Intelli-*  
597 *gence Conference and Eighth AAAI Symposium on Educational Advances in Artificial Intelli-*  
598 *gence*, AAAI'18/IAAI'18/EAAI'18. AAAI Press, 2018. ISBN 978-1-57735-800-8.
- 599 Sven Gronauer and Klaus Diepold. Multi-agent deep reinforcement learning: a survey. *Artificial*  
600 *Intelligence Review*, 55(2):895–943, February 2022. ISSN 1573-7462. doi: 10.1007/s10462-  
601 021-09996-w. URL <https://doi.org/10.1007/s10462-021-09996-w>.
- 602 Jayesh K. Gupta, Maxim Egorov, and Mykel Kochenderfer. Cooperative multi-agent control us-  
603 ing deep reinforcement learning. In Gita Sukthankar and Juan A. Rodriguez-Aguilar (eds.), *Aut-*  
604 *onomous Agents and Multiagent Systems*, pp. 66–83, Cham, 2017. Springer International Pub-  
605 lishing. ISBN 978-3-319-71682-4.
- 606 Priyanshu Gupta, Shashank Kirtania, Ananya Singha, Sumit Gulwani, Arjun Radhakrishna, Sherry  
607 Shi, and Gustavo Soares. Metareflection: Learning instructions for language agents using past  
608 reflections. *arXiv preprint arXiv:2405.13009*, 2024.
- 609 Kelvin Guu, Kenton Lee, Zora Tung, Panupong Pasupat, and Ming-Wei Chang. Realm: retrieval-  
610 augmented language model pre-training. In *Proceedings of the 37th International Conference on*  
611 *Machine Learning*, ICML'20. JMLR.org, 2020.
- 612 Wenyue Hua, Jiang Guo, Mingwen Dong, Henghui Zhu, Patrick Ng, and Zhiguo Wang. Propagation  
613 and pitfalls: Reasoning-based assessment of knowledge editing through counterfactual tasks. In  
614 Lun-Wei Ku, Andre Martins, and Vivek Srikumar (eds.), *Findings of the Association for Comput-*  
615 *ational Linguistics ACL 2024*, pp. 12503–12525, Bangkok, Thailand and virtual meeting, August  
616 2024. Association for Computational Linguistics. doi: 10.18653/v1/2024.findings-acl.743. URL  
617 <https://aclanthology.org/2024.findings-acl.743>.
- 618 Zeyu Huang, Yikang Shen, Xiaofeng Zhang, Jie Zhou, Wenge Rong, and Zhang Xiong.  
619 Transformer-patcher: One mistake worth one neuron. In *The Eleventh International Conference*  
620 *on Learning Representations*, 2023. URL <https://openreview.net/forum?id=4oYUGeGBpm>.
- 621 Shariq Iqbal and Fei Sha. Actor-attention-critic for multi-agent reinforcement learning, 2019. URL  
622 <https://openreview.net/forum?id=HJx7I309Fm>.
- 623 Gautier Izacard, Patrick Lewis, Maria Lomeli, Lucas Hosseini, Fabio Petroni, Timo Schick, Jane  
624 Dwivedi-Yu, Armand Joulin, Sebastian Riedel, and Edouard Grave. Atlas: Few-shot learning  
625 with retrieval augmented language models, 2022. URL <https://arxiv.org/abs/2208.03299>.
- 626 Xisen Jin, Dejiao Zhang, Henghui Zhu, Wei Xiao, Shang-Wen Li, Xiaokai Wei, Andrew Arnold, and  
627 Xiang Ren. Lifelong pretraining: Continually adapting language models to emerging corpora. In  
628 Angela Fan, Suzana Ilic, Thomas Wolf, and Matthias Gallé (eds.), *Proceedings of BigScience*  
629 *Episode #5 – Workshop on Challenges & Perspectives in Creating Large Language Models*, pp.  
630 1–16, virtual+Dublin, May 2022. Association for Computational Linguistics. doi: 10.18653/v1/  
631 2022.bigscience-1.1. URL <https://aclanthology.org/2022.bigscience-1.1>.
- 632 Gurusha Juneja, Nagarajan Natarajan, Hua Li, Jian Jiao, and Amit Sharma. Task facet learning: A  
633 structured approach to prompt optimization, 2024. URL <https://arxiv.org/abs/2406.10504>.
- 634 Urvashi Khandelwal, Omer Levy, Dan Jurafsky, Luke Zettlemoyer, and Mike Lewis. Generaliza-  
635 tion through memorization: Nearest neighbor language models. In *International Conference on*  
636 *Learning Representations*, 2020. URL <https://openreview.net/forum?id=HkIBjCEKvH>.
- 637 Nikita Kitaev, Lukasz Kaiser, and Anselm Levskaya. Reformer: The efficient transformer. In *Inter-*  
638 *national Conference on Learning Representations*, 2020. URL <https://openreview.net/forum?id=rkGNkkHtvB>.
- 639 Yuhang Lai, Chengxi Li, Yiming Wang, Tianyi Zhang, Ruiqi Zhong, Luke Zettlemoyer, Scott Wen  
640 tau Yih, Daniel Fried, Sida Wang, and Tao Yu. Ds-1000: A natural and reliable benchmark for  
641 data science code generation. *ArXiv*, abs/2211.11501, 2022.

- 648 Joel Z. Leibo, Vinicius Zambaldi, Marc Lanctot, Janusz Marecki, and Thore Graepel. Multi-agent  
649 reinforcement learning in sequential social dilemmas. In *Proceedings of the 16th Conference on*  
650 *Autonomous Agents and MultiAgent Systems*, AAMAS '17, pp. 464–473, Richland, SC, 2017.  
651 International Foundation for Autonomous Agents and Multiagent Systems.
- 652 Belinda Z. Li, Emmy Liu, Alexis Ross, Abbas Zeitoun, Graham Neubig, and Jacob Andreas. Lan-  
653 guage modeling with editable external knowledge, 2024. URL <https://arxiv.org/abs/2406.11830>.
- 654 Nelson F. Liu, Kevin Lin, John Hewitt, Ashwin Paranjape, Michele Bevilacqua, Fabio Petroni, and  
655 Percy Liang. Lost in the middle: How language models use long contexts. *Transactions of the*  
656 *Association for Computational Linguistics*, 12:157–173, 2024. doi: 10.1162/tacl\_a.00638. URL  
657 <https://aclanthology.org/2024.tacl-1.9>.
- 658 Yang Liu, Dan Iter, Yichong Xu, Shuo Wang, Ruochen Xu, and Chenguang Zhu. G-eval: Nlg  
659 evaluation using gpt-4 with better human alignment. In *Conference on Empirical Methods in*  
660 *Natural Language Processing*, 2023. URL <https://api.semanticscholar.org/CorpusID:257804696>.
- 661 Aman Madaan, Niket Tandon, Peter Clark, and Yiming Yang. Memory-assisted prompt editing to  
662 improve GPT-3 after deployment. In Yoav Goldberg, Zornitsa Kozareva, and Yue Zhang (eds.),  
663 *Proceedings of the 2022 Conference on Empirical Methods in Natural Language Processing*, pp.  
664 2833–2861, Abu Dhabi, United Arab Emirates, December 2022. Association for Computational  
665 Linguistics. doi: 10.18653/v1/2022.emnlp-main.183. URL <https://aclanthology.org/2022.emnlp->  
666 [main.183](https://aclanthology.org/2022.emnlp-main.183).
- 667 Joshua Maynez, Shashi Narayan, Bernd Bohnet, and Ryan McDonald. On faithfulness and factuality  
668 in abstractive summarization. In Dan Jurafsky, Joyce Chai, Natalie Schluter, and Joel Tetreault  
669 (eds.), *Proceedings of the 58th Annual Meeting of the Association for Computational Linguistics*,  
670 pp. 1906–1919, Online, July 2020. Association for Computational Linguistics. doi: 10.18653/v1/  
671 2020.acl-main.173. URL <https://aclanthology.org/2020.acl-main.173>.
- 672 Kevin Meng, David Bau, Alex Andonian, and Yonatan Belinkov. Locating and editing factual associ-  
673 ations in GPT. *Advances in Neural Information Processing Systems*, 36, 2022. arXiv:2202.05262.
- 674 Kevin Meng, Arnab Sen Sharma, Alex J Andonian, Yonatan Belinkov, and David Bau. Mass-editing  
675 memory in a transformer. In *The Eleventh International Conference on Learning Representations*,  
676 2023. URL <https://openreview.net/forum?id=MkbcAHIYgyS>.
- 677 Yasumasa Onoe, Michael Zhang, Shankar Padmanabhan, Greg Durrett, and Eunsol Choi. Can  
678 LMs learn new entities from descriptions? challenges in propagating injected knowledge. In  
679 Anna Rogers, Jordan Boyd-Graber, and Naoaki Okazaki (eds.), *Proceedings of the 61st An-  
680 nual Meeting of the Association for Computational Linguistics (Volume 1: Long Papers)*, pp.  
681 5469–5485, Toronto, Canada, July 2023. Association for Computational Linguistics. doi:  
682 10.18653/v1/2023.acl-long.300. URL <https://aclanthology.org/2023.acl-long.300>.
- 683 Shankar Padmanabhan, Yasumasa Onoe, Michael JQ Zhang, Greg Durrett, and Eunsol Choi. Prop-  
684 agating knowledge updates to LMs through distillation. In *Thirty-seventh Conference on Neural*  
685 *Information Processing Systems*, 2023. URL <https://openreview.net/forum?id=DFaGf3O7jf>.
- 686 Ofir Press, Noah Smith, and Mike Lewis. Train short, test long: Attention with linear biases enables  
687 input length extrapolation. In *International Conference on Learning Representations*, 2022. URL  
688 <https://openreview.net/forum?id=R8sQPpGCv0>.
- 689 Reid Pryzant, Dan Iter, Jerry Li, Yin Lee, Chenguang Zhu, and Michael Zeng. Automatic prompt  
690 optimization with “gradient descent” and beam search. In Houda Bouamor, Juan Pino, and Kalika  
691 Bali (eds.), *Proceedings of the 2023 Conference on Empirical Methods in Natural Language Pro-  
692 cessing*, pp. 7957–7968, Singapore, December 2023. Association for Computational Linguistics.  
693 doi: 10.18653/v1/2023.emnlp-main.494. URL <https://aclanthology.org/2023.emnlp-main.494>.
- 694 Pragnya Ramjee, Bhuvan Sachdeva, Satvik Golechha, Shreyas Kulkarni, Geeta Fulari, Kaushik Mu-  
695 rali, and Mohit Jain. Cataractbot: An llm-powered expert-in-the-loop chatbot for cataract patients,  
696 2024. URL <https://arxiv.org/abs/2402.04620>.

- 702 Weijia Shi, Sewon Min, Michihiro Yasunaga, Minjoon Seo, Rich James, Mike Lewis, Luke Zettle-  
703 moyer, and Wen tau Yih. Replug: Retrieval-augmented black-box language models, 2023. URL  
704 <https://arxiv.org/abs/2301.12652>.
- 705  
706 Noah Shinn, Federico Cassano, Edward Berman, Ashwin Gopinath, Karthik Narasimhan, and  
707 Shunyu Yao. Reflexion: Language agents with verbal reinforcement learning, 2023. URL  
708 <https://arxiv.org/abs/2303.11366>.
- 709  
710 Hongjin Su, Shuyang Jiang, Yuhang Lai, Haoyuan Wu, Boao Shi, Che Liu, Qian Liu, and Tao Yu.  
711 Arks: Active retrieval in knowledge soup for code generation. *ArXiv*, abs/2402.12317, 2024a.  
712 URL <https://api.semanticscholar.org/CorpusID:267750919>.
- 713  
714 Jianlin Su, Murtadha Ahmed, Yu Lu, Shengfeng Pan, Wen Bo, and Yunfeng Liu. Roformer: En-  
715 hanced transformer with rotary position embedding. *Neurocomput.*, 568(C), March 2024b. ISSN  
716 0925-2312. doi: 10.1016/j.neucom.2023.127063. URL <https://doi.org/10.1016/j.neucom.2023.127063>.
- 717  
718 Ardi Tampuu, Tambet Matiisen, Davide Kodolja, Igor Kuzovkin, Kristjan Korjus, Jaan Aru, Bo-  
719 rys Teodor Aru, and Raul Vicente. Multiagent cooperation and competition with deep reinforce-  
720 ment learning. *PLOS ONE*, 12(4):e0172395, 2017. doi: 10.1371/journal.pone.0172395. URL  
721 <https://doi.org/10.1371/journal.pone.0172395>.
- 722  
723 Ming Tan. Multi-agent reinforcement learning: independent versus cooperative agents. In *Proceed-*  
724 *ings of the Tenth International Conference on International Conference on Machine Learning*,  
725 ICML’93, pp. 330–337, San Francisco, CA, USA, 1993. Morgan Kaufmann Publishers Inc. ISBN  
1558603077.
- 726  
727 Jiaan Wang, Yunlong Liang, Zengkui Sun, Yuxuan Cao, Jiarong Xu, and Fandong Meng. Cross-  
728 lingual knowledge editing in large language models. In Lun-Wei Ku, Andre Martins, and  
729 Vivek Srikumar (eds.), *Proceedings of the 62nd Annual Meeting of the Association for Com-*  
730 *putational Linguistics (Volume 1: Long Papers)*, pp. 11676–11686, Bangkok, Thailand, August  
731 2024a. Association for Computational Linguistics. doi: 10.18653/v1/2024.acl-long.627. URL  
<https://aclanthology.org/2024.acl-long.627>.
- 732  
733 Sinong Wang, Belinda Z. Li, Madian Khabsa, Han Fang, and Hao Ma. Linformer: Self-attention  
734 with linear complexity, 2020. URL <https://arxiv.org/abs/2006.04768>.
- 735  
736 Weixuan Wang, Barry Haddow, and Alexandra Birch. Retrieval-augmented multilingual knowledge  
737 editing. In Lun-Wei Ku, Andre Martins, and Vivek Srikumar (eds.), *Proceedings of the 62nd*  
738 *Annual Meeting of the Association for Computational Linguistics (Volume 1: Long Papers)*, pp.  
739 335–354, Bangkok, Thailand, August 2024b. Association for Computational Linguistics. doi:  
10.18653/v1/2024.acl-long.21. URL <https://aclanthology.org/2024.acl-long.21>.
- 740  
741 Xinyuan Wang, Chenxi Li, Zhen Wang, Fan Bai, Haotian Luo, Jiayou Zhang, Nebojsa Jojic, Eric P.  
742 Xing, and Zhiting Hu. Promptagent: Strategic planning with language models enables expert-level  
743 prompt optimization, 2023. URL <https://arxiv.org/abs/2310.16427>.
- 744  
745 Yihan Wang, Beining Han, Tonghan Wang, Heng Dong, and Chongjie Zhang. {DOP}: Off-policy  
746 multi-agent decomposed policy gradients. In *International Conference on Learning Representa-*  
747 *tions*, 2021. URL <https://openreview.net/forum?id=6FqKiVAdI3Y>.
- 748  
749 Yan Xu, Mahdi Namazifar, Devamanyu Hazarika, Aishwarya Padmakumar, Yang Liu, and Dilek  
750 Hakkani-Tur. KILM: Knowledge injection into encoder-decoder language models. In Anna  
751 Rogers, Jordan Boyd-Graber, and Naoaki Okazaki (eds.), *Proceedings of the 61st Annual Meet-*  
752 *ing of the Association for Computational Linguistics (Volume 1: Long Papers)*, pp. 5013–5035,  
753 Toronto, Canada, July 2023. Association for Computational Linguistics. doi: 10.18653/v1/2023.  
acl-long.275. URL <https://aclanthology.org/2023.acl-long.275>.
- 754  
755 Shunyu Yao, Jeffrey Zhao, Dian Yu, Nan Du, Izhak Shafran, Karthik Narasimhan, and Yuan Cao.  
React: Synergizing reasoning and acting in language models, 2023. URL <https://arxiv.org/abs/2210.03629>.

756 Lang Yu, Qin Chen, Jie Zhou, and Liang He. Melo: Enhancing model editing with neuron-indexed  
757 dynamic lora. *Proceedings of the AAAI Conference on Artificial Intelligence*, 38(17):19449–  
758 19457, Mar. 2024. doi: 10.1609/aaai.v38i17.29916. URL [https://ojs.aaai.org/index.php/AAAI/  
759 article/view/29916](https://ojs.aaai.org/index.php/AAAI/article/view/29916).

760 Fengji Zhang, Bei Chen, Yue Zhang, Jacky Keung, Jin Liu, Daoguang Zan, Yi Mao, Jian-Guang  
761 Lou, and Weizhu Chen. Repocoder: Repository-level code completion through iterative retrieval  
762 and generation, 2023. URL <https://arxiv.org/abs/2303.12570>.

763  
764 Chunting Zhou, Graham Neubig, Jiatao Gu, Mona Diab, Francisco Guzmán, Luke Zettlemoyer,  
765 and Marjan Ghazvininejad. Detecting hallucinated content in conditional neural sequence gen-  
766 eration. In Chengqing Zong, Fei Xia, Wenjie Li, and Roberto Navigli (eds.), *Findings of the  
767 Association for Computational Linguistics: ACL-IJCNLP 2021*, pp. 1393–1404, Online, August  
768 2021. Association for Computational Linguistics. doi: 10.18653/v1/2021.findings-acl.120. URL  
769 <https://aclanthology.org/2021.findings-acl.120>.

770  
771  
772  
773  
774  
775  
776  
777  
778  
779  
780  
781  
782  
783  
784  
785  
786  
787  
788  
789  
790  
791  
792  
793  
794  
795  
796  
797  
798  
799  
800  
801  
802  
803  
804  
805  
806  
807  
808  
809

## A APPENDIX

### A.1 PROMPTS USED IN MAC-CAFE

```

""" There exists a Language Model based software named CodeRAG that automatically does the following
task for a developer: task - task.desc
CodeRAG uses a knowledge base to perform this task: kb.desc
A developer used CodeRAG to perform the task on multiple files, and CodeRAG made some errors on them.
Here is one knowledge base file that was involved in these errors: "" for i, file in
enumerate(kb.files): prompt += f""" File i+1: id: file['id'] content:
n<file>
nfile['content']
n</file>
n""" if "special_notes" in file and file["special_notes"] != "": prompt += f"""
nspecial_notes: file['special_notes']"""
""" The following are the reflections on the errors made by CodeRAG: reflections_str
The reflections show the relationship of the file with the errors made by CodeRAG. If the file is named
"None," it means the information about the error on which the reflection is based does not fully fit any
knowledge base file.
Your task is to use the reflections on the errors made by CodeRAG and provide a generalization on the
issues with the file and how it can be improved to prevent the errors.
You should mention common issues found in the reflections and provide a plan for improving the knowledge
base files to prevent future errors. Use the reflections to suggest additions or changes in the file,
explaining what new content should be added to prevent errors. Before suggesting your plan, give context
on the errors using code snippets and other relevant information from the reflections.
You have a scratchpad to reason and plan your generalization. Your scratchpad is for your use only and
will not be shared with anyone else. The scratchpad is represented by the <scratchpad></scratchpad>
tags.
Your generalization should follow this format: <scratchpad> The contents of the scratchpad </scratchpad>
<generalization> Your generalization for this file </generalization>
You must provide the filled-out scratchpad and generalization in the above format.
General guidelines: 1. Carefully analyze the reflections to understand the errors CodeRAG is making. 2.
"None" is a special file, representing that to fix the error, the information should be in a new file.
"""

```

Figure 4: Generalization Stage Prompt



864  
865  
866  
867  
868  
869  
870  
871  
872  
873  
874  
875  
876  
877  
878  
879  
880  
881  
882  
883  
884  
885  
886  
887  
888  
889  
890  
891  
892  
893  
894  
895  
896  
897  
898  
899  
900  
901  
902  
903  
904  
905  
906  
907  
908  
909  
910  
911  
912  
913  
914  
915  
916  
917

```

""" Your task is to reflect upon the errors made by CodeRAG based on the user feedback and provide a
reflection on the role of the knowledge base files in the making of those errors.
Your reflection should be very specific to the knowledge base files as these reflections will be used to
improve the knowledge base files to prevent such errors in the future.
There may be other causes for the error, but you should only focus on whether the knowledge base files
could have prevented the error.
You should also provide a way for improving the knowledge base files to prevent the error from happening
again.
You should try and see if there is any error in the information provided by the knowledge base or if the
knowledge base is missing some information that could have prevented the error.
You also have to figure out if the file should be edited or not. That you do through the needs_editing
flag.
You have a scratchpad in which you can reason and plan your reflection. Your scratchpad is for your use
only and will not be shared with anyone else. This scratchpad is represented by the <scratchpad> tags.
Your output should be in the following format:

<scratchpad>
The contents of the scratchpad
</scratchpad>

<reflection>
<File 1>
File: Name of the first file
needs_editing: True/False
Reflection: The reflection for this file
</File 1>

<File 2>
File: Name of the second file
needs_editing: True/False
Reflection: The reflection for this file
</File 2>
...
</reflection>

You have to provide the filled-out scratchpad and the reflection in the above-described formats. You
have to reflect on all the files that were extracted for the code file.
Here are some general guidelines to follow:

1. You should first analyze the question, the test bench, the feedback, and the output to
understand the error made by CodeRAG.
2. Then you should carefully analyze the knowledge base files to see if the theme and the
contents of any knowledge base file are relevant to the error. Particularly, you should look
out for files that have a factual error related to the error or are missing some information
which should have been in the file according to the theme of the file.
    (a) Read the content of the file and understand the theme of the file. The theme of this
file is of course based on the file ID and the content of the file but you should also
consider its positioning in the knowledge base. That means you should consider the other
files that were extracted for the code file and see how this file fits in with them.
For example, if the file is a very basic general guide to the task with other files
providing more detailed information, then it would make sense for this file to not have
detailed information about specific cases.
    (b) See if the file has any information related to the error. Check for relevant keywords
and how the file might have biased the language model to make the error.
    (c) If the file has information related to the error, see if the information is correct and
complete. If the information is incorrect or incomplete, the file is responsible for the
error.
    (d) If it doesn't have information related to the error, check if it makes sense for the
file to have information related to the error. If it doesn't make sense, the file is not
responsible for the error. When deciding this, check whether the information would be
better suited in any of the other knowledge base files. If the missing info fits better
in another file, then deem this file to not be responsible for the error as the missing
content can be better placed in the other file.
    (e) If the file is responsible for the error, explain the error in your reflection and set
the needs_editing flag to True. And if the file is not responsible for the error, set the
needs_editing flag to False.
3. If none of the files have any error or if you think the content for the error should be in
a new file, put a file with the name 'None' in your reflection and for its reflection,
describe the error and mention why it is not due to the knowledge base files. For the 'None'
file, the needs_editing flag should always be set to True. The 'None' file should be placed
as File n+1 where n is the number of files extracted for the code file.
4. Choose the least number of files for editing, we want to change as few files as we can for any
error. For example, if we have 5 knowledge base files, unless very extreme cases, we wouldn't
want to set the needs_editing flag as True on more than 2 files. Figure out what the most
relevant files for the error are and focus on them.
5. When you choose to edit multiple files, you should make sure that their involvements in the
error are distinct and not overlapping. If they are overlapping, think about whether changing
one file would be enough to fix the error.

"""

```

Figure 5: Selection Stage Prompt

918  
919  
920  
921  
922  
923  
924  
925  
926  
927  
928  
929  
930  
931  
932  
933  
934  
935  
936  
937  
938  
939  
940  
941  
942  
943  
944  
945  
946  
947  
948  
949  
950  
951  
952  
953  
954  
955  
956  
957  
958  
959  
960  
961  
962  
963  
964  
965  
966  
967  
968  
969  
970  
971

```

""" There exists a Language Model based software named CodeRAG that automatically does the following
task for a developer:
{test_bench_code}

The test bench code gives a code where a function must be inserted and then it is tested with some
test cases.

CodeRAG then outputted the following code to answer the question:

if task_desc != "":
    prompt += f"""
{task} - {task_desc}
"""
else:
    prompt += f"""
{task}
"""

prompt += f"""

The developer used CodeRAG for a question. The question is as follows:
{query}

In the question, the developer provided the following test bench code:
{test_bench_code}

The test bench code gives a code where a function must be inserted and then it is
tested with some test cases.

CodeRAG then outputted the following code to answer the question:
{output_code}

Based on the above output, the developer gave the following feedback to CodeRAG:
{feedback}

CodeRAG uses a knowledge base to do this task
{kb_desc}

The following files were extracted for this particular code file (the content of
each file is surrounded in <file></file> tags):
"""
for i, instruction in enumerate(instructions):
    prompt += f"""
File {i+1}:
id: "{instruction['id']}"
content: \n<file>\n{instruction['content']}\n</file>\n
"""
    if "special_notes" in instruction and instruction["special_notes"] != "":
        prompt += f"""\nspecial_notes: {instruction['special_notes']}"""

prompt += """
Your task is to reflect upon the errors made by CodeRAG based on the user feedback.
You have to explain in detail the error made by CodeRAG. The reflection should be
very specific to the question, the output code and the feedback.
You should start by explaining the question that CodeRAG was asked to solve before talking about the error.

Your reflection should have relevant code snippets from the output
code which have errors and what should be done to fix them.
You should also add a small code example to demonstrate the error and potential methods to fix it.

You can talk about multiple different methods here to address the error.

You have a scratchpad in which you can reason and plan your reflection.

Your scratchpad is for your use only and will not be shared with anyone else.

Your reflection should be in the following format:
<scratchpad>
The contents of the scratchpad
</scratchpad>
<reflection>
Your reflection
</reflection>
"""
"""

```

Figure 6: Reflection Stage Prompt

972  
973  
974  
975  
976  
977  
978  
979  
980  
981  
982  
983  
984  
985  
986  
987  
988  
989  
990  
991  
992  
993  
994  
995  
996  
997  
998  
999  
1000  
1001  
1002  
1003  
1004  
1005  
1006  
1007  
1008  
1009  
1010  
1011  
1012  
1013  
1014  
1015  
1016  
1017  
1018  
1019  
1020  
1021  
1022  
1023  
1024  
1025

```

"""
There exists a Language Model based software named CodeRAG that automatically does the following task
for a developer:
{task} - {task_desc}

CodeRAG was used to perform the task on a specific repository.
The following files in the repository were edited by CodeRAG:
<files>
{files}
</files>

A developer has provided the following feedback on CodeRAG's output:
<feedback>
{feedback}
</feedback>

Your task is to parse this feedback.
You must separate the larger feedback into smaller feedbacks, where each feedback corresponds
to a specific file in the repository.
**DO NOT** change the content of the feedback. Your job is only to split the feedback into file-level
feedbacks, without altering the feedback's content in any way.

You should respond in the following output format:
```json
{
  "task": The task name, like {task},
  "num_files": The number of files mentioned in the feedback,
  "feedback_files": [
    {
      "target_file": The file name that the feedback is about, it should be the
        whole path of the file, leave it empty if you are not sure which file the feedback is about. If
        the file name is not empty,
        it should be one of the files in the repository.

        If the file name does not exist in the repository, put an empty string here,
      "num_feedbacks": The number of feedbacks for this file,
      "feedbacks": [
        {
          "feedback_tone": The tone of the feedback, can take the values 'positive' or
            'negative',
          "target_spans": The spans of the code that the feedback is about.

          It is a list of json objects with two keys, 'start' and 'end'.

          Put an empty list if you are not sure which code span the feedback is about,
          "feedback": Description of the feedback,
        }
      ]
    }
  ]
}
```
Make sure to include the backticks (```) surrounding the output. They are needed for further parsing of
your output. """

```

Figure 7: Feedback Parsing Prompt
